# Supplementary material for: Application effect of Standardized Nursing Process of abdominal drainage tube in cholelithiasis: a single-center retrospective cohort study
Source: Research Square preprint supplement (doi:10.21203/rs.3.rs-5891691/v1), 2025-04-03
Supplement: Supplementary file 1 [file d0be0640b7a717f5ff95ae85.docx]

**Application effect of Standardized Nursing Process of abdominal drainage tube in cholelithiasis: a single-center retrospective cohort study**

**Running title：standardized nursing process for cholelithiasis**

| **Table S1. Characteristics of hematological parameters before and after surgery** | | | |
| --- | --- | --- | --- |
| **Items** | **non-SNP (n=117)** | **SNP (n=147)** | **P Value** |
| **△Leukocyte(10^9/L)** | 1.38 (1.02,1.76) | 1.32 (0.97,1.81) | 0.623 |
| **△CRP** | 1.66 (0.72,2.52) | 1.33 (0.56,2.28) | 0.106 |
| **△HBP** | 1.49 (0.97,2.3) | 1.48 (0.85,2.41) | 0.917 |
| **△Neutrophil (%)** | 1.27±0.33 | 1.24±0.31 | 0.467 |
| **△DB** | 1.33 (0.94,1.68) | 1.26 (0.76,1.79) | 0.670 |
| **△TB** | 1.27 (0.93,1.66) | 1.18 (0.68,1.74) | 0.263 |
| **△ALT** | 1.56 (1.08,2.43) | 1.47 (0.86,2.28) | 0.131 |
| **△AST** | 1.56 (1.11,2.47) | 1.58 (1.08,2.21) | 0.677 |
| **△：the preoperative value divided by the postoperative value on day three was expressed; CRP, C-reactive protein; HBP, Heparin Binding Protein; DB, Direct bilirubin; TB, Total bilirubin; ALT, alanine transaminase; AST, Aspartate transaminase** | | | |

| **Table S2. Univariable and multivariable analysis for drainage tube outlet Leakage** | | | | |
| --- | --- | --- | --- | --- |
| **Items** | **Univariable** | | **Multivariable** | |
| **OR [95%CI]** | **P Value** | **OR [95%CI]** | **P Value** |
| **SNP** | 0.44[0.23,0.85] | ***0.014*** | 0.48[0.25,0.93] | ***0.029*** |
| **Gender** | 1.04[0.55,1.98] | 0.900 |  |  |
| **Age** | 1.00[0.98,1.02] | 0.967 |  |  |
| **BMI** | 1.01[0.99,1.04] | 0.237 |  |  |
| **Hypertension** | 0.94[0.39,2.27] | 0.888 |  |  |
| **Diabetes** | 0.83[0.30,2.27] | 0.713 |  |  |
| **Surgeon** | 1.04[0.54,1.98] | 0.906 |  |  |
| **Operating time** | 1.00[0.98,1.01] | 0.751 |  |  |
| **Leukocyte(10^9/L)** | 0.99[0.96,1.03] | 0.725 |  |  |
| **CRP** | 1.00[1.00,1.01] | 0.491 |  |  |
| **HBP** | 1.00[1.00,1.01] | 0.268 |  |  |
| **Neutrophil (%)** | 1.00[0.98,1.01] | 0.679 |  |  |
| **DB** | 0.96[0.91,1.02] | 0.188 | 1.00[0.90,1.10] | 0.929 |
| **TB** | 0.98[0.95,1.01] | 0.144 | 0.99[0.94,1.04] | 0.617 |
| **ALT** | 1.00[0.99,1.00] | 0.171 | 1.00[0.99,1.00] | 0.439 |
| **AST** | 1.00[0.99,1.00] | 0.283 |  |  |
| **Drainage tube Dislodged** | 0.79[0.09,6.68] | 0.825 |  |  |
| **CRP, C-reactive protein; HBP, Heparin Binding Protein; DB, Direct bilirubin; TB, Total bilirubin; ALT, alanine transaminase; AST, Aspartate transaminase** | | | | |

| **Table S3. Univariable and multivariable analysis for post-extubation leakage** | | | | |
| --- | --- | --- | --- | --- |
| **Items** | **Univariable** | | **Multivariable** | |
| **OR [95%CI]** | **P Value** | **OR [95%CI]** | **P Value** |
| **SNP** | 0.11[0.03,0.40] | ***0.001*** | 0.12[0.03,0.41] | ***0.001*** |
| **Gender** | 2.10[0.79,5.60] | 0.137 | 0.48[0.17,1.36] | 0.169 |
| **Age** | 1.03[0.99,1.06] | 0.134 | 1.02[0.99,1.06] | 0.191 |
| **BMI** | 0.95[0.86,1.06] | 0.398 |  |  |
| **Hypertension** | 1.27[0.40,3.98] | 0.683 |  |  |
| **Diabetes** | 1.18[0.33,4.26] | 0.797 |  |  |
| **Surgeon** | 1.68[0.69,4.12] | 0.253 |  |  |
| **Operating time** | 0.98[0.96,1.00] | 0.079 | 0.98[0.96,1.00] | 0.095 |
| **Leukocyte(10^9/L)** | 0.99[0.93,1.06] | 0.818 |  |  |
| **CRP** | 1.00[1.00,1.01] | 0.320 |  |  |
| **HBP** | 1.00[0.99,1.01] | 0.810 |  |  |
| **Neutrophil (%)** | 1.00[0.98,1.02] | 0.825 |  |  |
| **DB** | 0.95[0.86,1.05] | 0.336 |  |  |
| **TB** | 0.96[0.91,1.02] | 0.225 |  |  |
| **ALT** | 1.00[0.99,1.00] | 0.393 |  |  |
| **AST** | 1.00[0.99,1.00] | 0.644 |  |  |
| **Drainage tube Dislodged** | 1.97[0.23,17.22] | 0.538 |  |  |
| **CRP, C-reactive protein; HBP, Heparin Binding Protein; DB, Direct bilirubin; TB, Total bilirubin; ALT, alanine transaminase; AST, Aspartate transaminase** | | | | |
